# Supplementary material for: Understanding Editing Behaviors in Multilingual Wikipedia
Source: PubMed Central journal article supplement (PMC4865083; doi:10.1371/journal.pone.0155305), 2016-05-12
Supplement: pone.0155305.s001.pdf [file pone.0155305.s001.pdf]

# Supporting Information

S1 Table

| <b>Topic 1: Science</b>                   | <b>Topic 2: Football</b>              |
|-------------------------------------------|---------------------------------------|
| Museum Boerhaave                          | Bebé                                  |
| History of photography                    | Georgi Kinkladze                      |
| Planetarium                               | Raïs M'Bolhi                          |
| List of Dutch inventions and discoveries  | John Carew                            |
| Electrotyping                             | John Guidetti                         |
| <b>Topic 3: Film</b>                      | <b>Topic 4: Middle East Geography</b> |
| Levar Burton                              | Counties of Iran                      |
| Tribeca Film Festival                     | Shevir                                |
| Romeo and Juliet (films)                  | Robot (disambiguation)                |
| Viggo Mortensen                           | Rijan                                 |
| Walt Disney                               | Chalmeh                               |
| <b>Topic 5: American Sports</b>           | <b>Topic 6: Songs &amp; Albums</b>    |
| October 2005 in sports                    | Hurry Up, We're Dreaming              |
| NHL trade deadline                        | Paradise (Lana Del Rey EP)            |
| 2005 Nebraska Cornhuskers baseball team   | The Sweet Escape                      |
| Bobby Ryan                                | Ceremonials                           |
| History of the New York Jets              | Do It Again (the Beach Boys Song)     |
| <b>Topic 7: Musicians</b>                 | <b>Topic 8: Cities</b>                |
| The Decemberists                          | Schüttorf                             |
| The Band                                  | Rodgau                                |
| Carlos Santana                            | Aachen                                |
| Brian May                                 | Olpe                                  |
| Dirty Three                               | Lisbon                                |
| <b>Topic 9: Global Sports</b>             | <b>Topic 10: TV Shows</b>             |
| List of association football competitions | The Hunger Games Trilogy              |
| 1982 FIFA World Cup                       | The Penguins of Madagascar            |
| Promotion and relegation                  | The Real Adventures of Jonny Quest    |
| Lokomotiv Cove FC                         | The Animatrix                         |
| 1998 FIFA World Cup                       | M.I. High                             |
| <b>Topic 11: Politics</b>                 | <b>Topic 12: History</b>              |

|                                                   |                                       |
|---------------------------------------------------|---------------------------------------|
| European Conservatives and Reformists             | Pierre-Marie-Alphonse Favier          |
| Viktor Yushchenko                                 | Society of the Song Dynasty           |
| List of state leaders in 1993                     | Taukei Ni Waluvu                      |
| Tarja Halonen                                     | 17th century                          |
| United Kingdom Alternative Vote Referendum        | Eruera Maihi Patuone                  |
| <b>Topic 13: Military</b>                         | <b>Topic 14: Transportation</b>       |
| Air Warfare of World War II                       | Railway station layout                |
| Battle of Jutland                                 | Railways in Melbourne                 |
| Defence of the Reich                              | LSWR suburban lines                   |
| Battle of the River Plate                         | Train station                         |
| A World at War                                    | Hastings Line                         |
| <b>Topic 15: Computer</b>                         | <b>Topic 16: Education</b>            |
| Packet switching                                  | Stanford University                   |
| Videoconferencing                                 | Waded Cruzado                         |
| List of software forks                            | Massachusetts Institute of Technology |
| Bulletin board system                             | Vishen Lakhiani                       |
| Trusted computing                                 | University of California, Berkeley    |
| <b>Topic 17: Geographical Locations</b>           | <b>Topic 18: Descriptive</b>          |
| Quehanna Wild Area                                | BBC Sport                             |
| Global storm activity of 2009                     | BMC Racing Team                       |
| Death Valley National Park                        | Coca-Cola formula                     |
| Kimberley (Western Australia)                     | Coal                                  |
| Hwange National Park                              | Colombian cuisine                     |
| <b>Topic 19: Olympics</b>                         | <b>Topic 20: Animals &amp; Plants</b> |
| Chronological summary of the 2012 Summer Olympics | Lobatus Gigas                         |
| 2013 IPC Athletics World Championships            | List of recently extinct birds        |
| 2014 in Sports                                    | Galápagos Tortoise                    |
| Yelena Isinbayeva                                 | Common Starling                       |
| 1980 Summer Olympics                              | Giant Trevally                        |

**Topic Clusters from the English Edition of Wikipedia.** Examples of English Wikipedia article titles for discovered topics.
