# Supplementary material for: Understanding Editing Behaviors in Multilingual Wikipedia
Source: PubMed Central journal article supplement (PMC4865083; doi:10.1371/journal.pone.0155305), 2016-05-12
Supplement: pone.0155305.s002.pdf [file pone.0155305.s002.pdf]

# Supporting Information

## S2 Table

| <b>Topic 1: Art</b>             | <b>Topic 2: Descriptive</b>         |
|---------------------------------|-------------------------------------|
| Kinetic art                     | Ancient history                     |
| Self-portrait                   | Psychokinesis                       |
| Claude Monet                    | European Train Control System       |
| History of architecture         | Functional programming              |
| São Paulo Museum of Art         | Pluto                               |
| <b>Topic 3: Soccer</b>          | <b>Topic 4: Film</b>                |
| Celtic F.C.                     | The Great Gatsby (1974 film)        |
| Carlos Tévez                    | Tom Hiddleston                      |
| 1964 Argentine Primera División | Nickelodeon Movies                  |
| Everton F.C.                    | Penélope Cruz                       |
| FC Barcelona                    | Johnny Depp                         |
| Kaley Cuoco                     | Kaley Cuoco                         |
| <b>Topic 5: Animal</b>          | <b>Topic 6: Global Sports</b>       |
| Nudochernes leleupi             | Asian Football Confederation        |
| Oxydactylus                     | 2013 FIFA Confederations Cup        |
| Mordellistena chopardi          | 2018 FIFA World Cup                 |
| Parazaona pycta                 | UEFA Women's Euro 2013              |
| Desert Sparrow                  | Argentina national rugby union team |
| <b>Topic 7: History</b>         | <b>Topic 8: Plants</b>              |
| Gustaf VI Adolf of Sweden       | Notholaena                          |
| Hundred Years' War              | Martretia                           |
| King in Prussia                 | Peach                               |
| Catholic Monarchs               | Trevo                               |
| Maximilian I of Mexico          | Totora (plant)                      |
| <b>Topic 9: Politicians</b>     | <b>Topic 10: Natural Science</b>    |
| Alfonso Guerra                  | Ozone layer                         |
| List of Governors of Iowa       | Nitrogen cycle                      |
| First Lady of Peru              | Biomechanics                        |
| Ban Ki-moon                     | Earth's rotation                    |
| President of Honduras           | Spinal cord                         |

|                                            |                                               |
|--------------------------------------------|-----------------------------------------------|
| <b>Topic 11: Social Science</b>            | <b>Topic 12: Music</b>                        |
| Democratic centralism                      | Red (Taylor Swift album)                      |
| Political economy                          | Boys Like Girls                               |
| Market research                            | Barcelona (song)                              |
| Social movement                            | Get Lucky (Daft Punk song)                    |
| The Third Wave                             | Folk music                                    |
| <b>Topic 13: Cities</b>                    | <b>Topic 14: Geographical Locations</b>       |
| Machu Picchu                               | Regions of Senegal                            |
| Madrid                                     | Guavio Province                               |
| New Delhi                                  | Central Region Venezuela                      |
| Montreal                                   | Province of Castellón                         |
| Santiago                                   | Khar Turan National Park                      |
| <b>Topic 15: Olympics</b>                  | <b>Topic 16: Literature</b>                   |
| Czechoslovakia at the 1988 Winter Olympics | Spanish Golden Age                            |
| Denmark at the 1992 Winter Olympics        | Voltaire                                      |
| Great Britain at the 1992 Winter Olympics  | Poetry                                        |
| Finland at the 2010 Winter Olympics        | Franz Kafka                                   |
| Hungary at the 1956 Winter Olympics        | Giovanni Papini                               |
| <b>Topic 17: Musicians</b>                 | <b>Topic 18: Politics</b>                     |
| Metallica                                  | Venezuelan Democratic Party                   |
| Billy Joel                                 | Social Christian Reformist Party              |
| Janis Joplin                               | Andalusian parliamentary election 2004        |
| Keith Emerson                              | United States presidential election 1788–1789 |
| Marilyn Manson                             | Green Ecologist Party (Chile)                 |
| <b>Topic 19: Entertainment</b>             | <b>Topic 20: Tennis</b>                       |
| Half-Life 2                                | 2013 ATP Challenger Tour                      |
| Glee (TV series)                           | Canadian Open (tennis)                        |
| The Phantom of the Opera (1986 musical)    | 2013 Western & Southern Open                  |
| Garfield                                   | Maria Sharapova                               |
| Nickelodeon                                | Rafael Nadal                                  |

**Topic Clusters from the Spanish Edition of Wikipedia.** Examples of Spanish Wikipedia article titles for discovered topics (presented in English).
