# Supplementary material for: Understanding Editing Behaviors in Multilingual Wikipedia
Source: PubMed Central journal article supplement (PMC4865083; doi:10.1371/journal.pone.0155305), 2016-05-12
Supplement: pone.0155305.s003.pdf [file pone.0155305.s003.pdf]

# Supporting Information

## S3 Table

| <b>Topic 1: Computer</b>          | <b>Topic 2: Natural Science</b>                |
|-----------------------------------|------------------------------------------------|
| IPv6 rapid deployment             | Boiling point                                  |
| C (programming language)          | Solar cell                                     |
| Real-time operating system        | Recombinant DNA                                |
| Graphical user interface          | Klinefelter syndrome                           |
| Web Server Gateway Interface      | Volcano                                        |
| <b>Topic 3: Descriptive</b>       | <b>Topic 4: Geographical Locations: U.S.</b>   |
| Abraham Lincoln                   | Moorhead Mississippi                           |
| Anti-Zionism                      | Madison County Texas                           |
| Ice                               | List of cities in Virginia                     |
| Eiffel Tower                      | Leon County Florida                            |
| BMW 340                           | San Rafael California                          |
| <b>Topic 5: Names</b>             | <b>Topic 6: Geographical Locations: Europe</b> |
| Watson (Surname)                  | Westfalen                                      |
| Williamson (Surname)              | Pram Austria                                   |
| Taylor (Name)                     | Monforte Portugal                              |
| Shaw (Name)                       | Hamburg-Marienthal                             |
| Peter (Given Name)                | Cologne (Region)                               |
| <b>Topic 7: History</b>           | <b>Topic 8: Academic</b>                       |
| List of state leaders in 655      | University of Mannheim                         |
| Charles VIII of Sweden            | Computer science                               |
| Frederick William I of Prussia    | Individual psychology                          |
| Vianden Castle                    | Industrial sociology                           |
| Guelderian Wars                   | Keynesian economics                            |
| <b>Topic 9: Celebrities</b>       | <b>Topic 10: Soccer</b>                        |
| List of American novelists        | List of football clubs in Germany              |
| Lists of golfers                  | 2003–04 UEFA Cup                               |
| List of Medal of Honor recipients | Real Madrid C.F.                               |
| Franklin Roosevelt                | Lionel Messi                                   |
| Sebastian Shaw                    | Son Heung-Min                                  |

|                                            |                                              |
|--------------------------------------------|----------------------------------------------|
| <b>Topic 11: Cultural Heritage</b>         | <b>Topic 12: Musicians</b>                   |
| List of Cultural Property in Oberwil-Lieli | Eminem                                       |
| List of properties in Krumbach             | Flo Rida                                     |
| List of properties in Gleisdorf            | 2012 Grammy Awards                           |
| List of properties in Arnoldstein          | John Lennon                                  |
| List of properties in Bürs                 | Lady Gaga                                    |
| <b>Topic 13: Natural Topography</b>        | <b>Topic 14: Land Transport</b>              |
| Najerilla (River)                          | Hesper Valley Railway                        |
| Olympic National Park                      | Innsbruck Central Station                    |
| Nock Mountains                             | Highways in Bulgaria                         |
| Niedersonthofener See                      | List of tunnels in Germany                   |
| Quincy Bay                                 | Metrobus                                     |
| <b>Topic 15: Politicians</b>               | <b>Topic 16: Entertainment</b>               |
| Rudolf Hierl (Politician)                  | Denzel Washington                            |
| Ulrich Kelber                              | Bradley Cooper                               |
| Robert Thaller                             | Anna Karenina (2012 Film)                    |
| Norbert Otto (Politician)                  | Braid (Video Game)                           |
| Liam Aylward                               | Boss (TV series)                             |
| <b>Topic 17: Air transport</b>             | <b>Topic 18: Global Sports</b>               |
| Lombok International Airport               | Badminton at the Asian Games                 |
| Salzburg Airport                           | Australian Football International Cup        |
| Airline                                    | Australian Goldfields Open                   |
| Aviation accidents and incidents           | Australia national association football team |
| Human-powered helicopter                   | 2012–13 FA Cup                               |
| <b>Topic 19: Authors</b>                   | <b>Topic 20: Military</b>                    |
| Franz Kafka                                | Japanese conquest of Burma                   |
| Jan Zimmermann                             | Pacific War                                  |
| Herbert Schmidt                            | Russian Navy                                 |
| List of authors by name: F                 | Soviet submarine K-19                        |
| List of authors by name: W                 | Rocket artillery                             |

**Topic Clusters from the German Edition of Wikipedia.** Examples of German Wikipedia article titles for discovered topics (presented in English).
