# Supplementary material for: Understanding Editing Behaviors in Multilingual Wikipedia
Source: PubMed Central journal article supplement (PMC4865083; doi:10.1371/journal.pone.0155305), 2016-05-12
Supplement: pone.0155305.s004.pdf [file pone.0155305.s004.pdf]

# Supporting Information

## S4 Table

| Topic                   | Complexity | Primary | Non-Primary | t      | p-value   |
|-------------------------|------------|---------|-------------|--------|-----------|
| Science                 | 2.917      | 0.064   | 0.061       | 0.747  | 4.550E-01 |
| Football                | 1.995      | 0.029   | 0.031       | -0.756 | 4.496E-01 |
| Film                    | 2.610      | 0.046   | 0.048       | -0.542 | 5.880E-01 |
| Middle East Geography   | 1.733      | 0.001   | 0.002       | -1.081 | 2.799E-01 |
| American Sports         | 2.312      | 0.006   | 0.007       | -0.361 | 7.184E-01 |
| Music: Song, Albums     | 2.495      | 0.030   | 0.026       | 1.343  | 1.793E-01 |
| Music: Musician         | 2.630      | 0.057   | 0.060       | -0.801 | 4.231E-01 |
| Cities                  | 2.638      | 0.043   | 0.057       | -4.023 | 5.796E-05 |
| Sports Related Articles | 1.563      | 0.047   | 0.048       | -0.122 | 9.029E-01 |
| TV Shows                | 2.930      | 0.056   | 0.059       | -0.840 | 4.009E-01 |
| Politics                | 2.701      | 0.030   | 0.027       | 0.955  | 3.396E-01 |
| History                 | 3.071      | 0.196   | 0.189       | 1.208  | 2.271E-01 |
| Military                | 2.938      | 0.033   | 0.034       | -0.536 | 5.919E-01 |
| Transportation          | 2.565      | 0.014   | 0.016       | -1.368 | 1.715E-01 |
| Computer                | 2.577      | 0.057   | 0.049       | 2.099  | 3.582E-02 |
| Education               | 2.776      | 0.078   | 0.074       | 0.846  | 3.975E-01 |
| Geographical Locations  | 2.676      | 0.023   | 0.019       | 1.753  | 7.960E-02 |
| Descriptive             | 2.505      | 0.152   | 0.151       | 0.129  | 8.974E-01 |
| Olympics                | 1.952      | 0.022   | 0.023       | -0.348 | 7.278E-01 |
| Animal, Plants          | 2.770      | 0.017   | 0.020       | -1.471 | 1.413E-01 |

Table 1: **Syntactic Complexity for each Topic by Language Edition.** Syntactic complexity for 20 English topics and independent t-test results comparing contributions by primary and non-primary editors.

| Topic                     | Complexity | Primary | Non-Primary | t      | p-value   |
|---------------------------|------------|---------|-------------|--------|-----------|
| Computer                  | 3.219      | 0.047   | 0.030       | 3.070  | 2.157E-03 |
| Natural Science           | 3.511      | 0.035   | 0.022       | 2.943  | 3.276E-03 |
| Descriptive               | 3.220      | 0.304   | 0.322       | -1.445 | 1.486E-01 |
| Geographical Loc.: U.S.   | 2.025      | 0.002   | 0.002       | -0.434 | 6.643E-01 |
| Names                     | 2.361      | 0.013   | 0.011       | 0.700  | 4.840E-01 |
| Geographical Loc.: Europe | 2.964      | 0.036   | 0.028       | 1.685  | 9.200E-02 |
| History                   | 3.341      | 0.046   | 0.037       | 1.619  | 1.055E-01 |
| Academic                  | 3.432      | 0.123   | 0.117       | 0.709  | 4.783E-01 |
| Celebrities               | 3.120      | 0.038   | 0.036       | 0.392  | 6.949E-01 |
| Soccer                    | 2.769      | 0.036   | 0.051       | -2.393 | 1.679E-02 |
| Cultural Heritage         | 1.906      | 0.004   | 0.001       | 2.404  | 1.629E-02 |
| Musicians                 | 3.034      | 0.049   | 0.053       | -0.483 | 6.292E-01 |
| Natural Topography        | 3.062      | 0.025   | 0.025       | 0.019  | 9.845E-01 |
| Land Transport            | 3.306      | 0.026   | 0.027       | -0.139 | 8.896E-01 |
| Politicians               | 3.207      | 0.056   | 0.067       | -1.756 | 7.921E-02 |
| Entertainment             | 3.331      | 0.052   | 0.061       | -1.408 | 1.591E-01 |
| Air Transport             | 3.291      | 0.017   | 0.016       | 0.194  | 8.461E-01 |
| Global Sports             | 2.531      | 0.024   | 0.035       | -2.173 | 2.987E-02 |
| Authors                   | 3.429      | 0.046   | 0.037       | 1.765  | 7.760E-02 |
| Military                  | 3.630      | 0.021   | 0.021       | -0.050 | 9.603E-01 |

Table 2: **Syntactic Complexity for each Topic by Language Edition.** Syntactic complexity for 20 German topics and independent t-test results comparing contributions by primary and non-primary editors.

| <b>Topic</b>           | <b>Complexity</b> | <b>Primary</b> | <b>Non-Primary</b> | <b>t</b> | <b>p-value</b> |
|------------------------|-------------------|----------------|--------------------|----------|----------------|
| Art                    | 3.012             | 0.016          | 0.016              | 0.025    | 9.804E-01      |
| Descriptive            | 2.808             | 0.384          | 0.418              | -2.159   | 3.092E-02      |
| Soccer                 | 2.347             | 0.077          | 0.072              | 0.593    | 5.536E-01      |
| Film                   | 2.747             | 0.038          | 0.038              | 0.064    | 9.494E-01      |
| Animal                 | 2.444             | 0.002          | 0.002              | -0.358   | 7.201E-01      |
| Global Sports          | 2.295             | 0.038          | 0.031              | 1.115    | 2.648E-01      |
| History                | 3.001             | 0.011          | 0.010              | 0.417    | 6.769E-01      |
| Plants                 | 2.376             | 0.005          | 0.017              | -3.429   | 6.189E-04      |
| Politicians            | 3.179             | 0.032          | 0.019              | 2.443    | 1.466E-02      |
| Natural Science        | 3.084             | 0.039          | 0.051              | -1.676   | 9.387E-02      |
| Social Science         | 3.005             | 0.042          | 0.030              | 2.023    | 4.322E-02      |
| Music                  | 2.789             | 0.052          | 0.039              | 1.741    | 8.183E-02      |
| Cities                 | 2.931             | 0.081          | 0.087              | -0.670   | 5.029E-01      |
| Geographical Locations | 2.523             | 0.020          | 0.037              | -3.324   | 8.991E-04      |
| Olympics               | 1.970             | 0.001          | 0.002              | -0.423   | 6.725E-01      |
| Literature             | 3.094             | 0.033          | 0.037              | -0.645   | 5.193E-01      |
| Musicians              | 2.814             | 0.027          | 0.024              | 0.503    | 6.147E-01      |
| Politics               | 3.029             | 0.022          | 0.019              | 0.599    | 5.492E-01      |
| Entertainment          | 2.967             | 0.076          | 0.046              | 3.736    | 1.921E-04      |
| Tennis                 | 2.654             | 0.004          | 0.005              | -0.552   | 5.811E-01      |

Table 3: **Syntactic Complexity for each Topic by Language Edition.** Syntactic complexity for 20 Spanish topics and independent t-test results comparing contributions by primary and non-primary editors.
